# Supplementary material
Source: PubMed Central journal article supplement (PMC2840083)
Supplement: 0902599107_pnas.200902599SI.pdf [file 0902599107_pnas.200902599SI.pdf]

# Supporting Information

Lafont et al. 10.1073/pnas.0902599107

## SI Materials and Methods

**Animals.** Under anesthesia, respiration was regulated using a small animal ventilator (SAR-830P, CWE, Inc.), and depth of anesthesia was assessed by monitoring pinch withdrawal and whisker movement. A custom-made holder was used to immobilize the skull, which was fixed with cyanoacrylate glue onto a glass slide. Body temperature was monitored by a rectal probe and maintained at 37 °C by a heating blanket (Homeothermic Blanket Control Unit; Harvard Apparatus), and heart rate was continuously monitored (Powerlab; AD Instruments). For superfusion, the physiological solution was (in mM) 125 NaCl, 2.5 KCl, 1.25 NaH<sub>2</sub>PO<sub>4</sub>, 26 NaHCO<sub>3</sub>, 12 glucose, 2 CaCl<sub>2</sub>, and 1 MgCl<sub>2</sub> (pH 7.4) when bubbled with 95% O<sub>2</sub>/5% CO<sub>2</sub>. For oxygen tension monitoring, the superfusion solution was 0.9% NaCl and 5 mM Hepes (pH 7.4).

All animal studies complied with the animal welfare guidelines of the European Community and/or UK Home Office guidelines, as appropriate. They were approved by the Languedoc Roussillon Institutional Animal Care and Use Committee (CE-LR-0818).

### Long Working Distance Imaging with Cellular Resolution and Analysis.

Long working distance objectives: M Plan Apo ×20, 0.43 NA, 2.8 cm WD; ×20, 0.60 NA, 1.3 cm WD; all from Mitutoyo. Fluorescence excitation was delivered by a Lambda LS xenon arc lamp (300W; Sutter Instruments) fitted with a fast-rotating filter wheel (27 ms lag) and linked to the stereomicroscope with an optical fiber. Fluorescence emission was captured by an EM-CCD camera 512 × 512 C9100 (Hamamatsu) and acquired with MetaMorph software (Molecular Devices). New software tools were developed to correct images (registration) for movement due to respiration or blood pressure and for blood flow analysis. The registration tool is based on a subpixel translation obtained from a minimal image difference search. Blood flow was obtained from a statistical analysis of time-space diagrams of the intensities along defined capillary paths. All of the software tools were implemented in the ImageJ environment, with registration and velocity calculations made with two different plugins. The software tools can be freely downloaded from <http://ipam.igf.cnrs.fr/en/index.php?page=how-cmsms-works>.

### Blood Flow Measurements, Oxygen Tension Monitoring, and Dye Injections.

Oxygen electrodes with a tip diameter of 2–5 μm were calibrated at 37 °C before experiments, first in saline with 21% oxygen (air saturated) and then in 0% oxygen (bubbled with nitrogen). The data were acquired at 10 Hz (Powerlab; AD Instruments). In some experiments, P<sub>tiss,O<sub>2</sub></sub> was measured in acute pituitary slices, which were made as previously reported (1). Pituitary slices were continuously perfused with Ringer solution buffered with 20 mM hepes at pH 7.4 (2, 3).

Fluorescent dextrans were introduced by iontophoresis (Microiontophoresis Dual Current Generator 260; World Precision Instruments) from a glass micropipette introduced under visual guidance, avoiding blood vessels. Iontophoretic rather than hydrostatic injections were used to minimize pressure/flow artifacts, and repeated injections showed that similar observations could be repeatedly obtained at different local sites in the field. Images were analyzed using the ImageJ plugins described previously.

To assess P<sub>tiss,O<sub>2</sub></sub> differences before and after i.v. GHRH injection, a two-tailed variance ratio test (*F* test) was used. Blood flow changes were assessed using a two-tailed variance ratio test followed by a Mann–Whitney *U* test to assess any differences directly attributable to treatment application (Fig. 3C). In all cases, treatment effects were considered significant at *P* < 0.05 (4).

**Calcium and Electrophysiological Recordings.** To monitor cytosolic calcium, cells were loaded with the fluorescent calcium dye fura-2/AM after bolus injection via a micropipette (pressure 0.2 bar during 2 min) controlled with a MP-285 micromanipulator (Sutter Instruments). A wheel splitter (Lambda 10-B; Sutter Instruments) in the xenon arc lamp enabled us to change the excitation wavelength in 27 ms without any vibrations of the stereomicroscope. Correlation coefficients were calculated on smoothed and detrended calcium time series using a lagged cross-correlation analysis of Fourier transforms (Fig. S2C). Positive correlation values were taken from the origin and plotted as a function of distance to create a correlation map. All analysis was performed using GraphPad Prism v5 (GraphPad Software Inc.) and Matlab (Mathworks Inc.). Electrical activity (5) was monitored with extracellular microelectrodes filled with 150 mM NaCl, 12.5 mM KCl, 0.5 mM Lucifer yellow (lithium salt) and Hepes (pH 7.4) connected to an AxoClamp 2B amplifier and the software Axoclamp (Axon Instruments).

**Multiphoton and Confocal Imaging of GH-EGFP Pituitaries.** For multiphoton and confocal imaging, pituitaries were collected on ice and fixed overnight in 4% paraformaldehyde. Multiphoton imaging was performed with a Zeiss LSM 510 NLO confocal system (25× oil, 0.8 NA). Multiphoton excitation was achieved with a mode-locked Ti:Sapphire Laser Chameleon (Coherent Inc.) tuned at 840 nm (pulse duration <140 fs) (1). Emitted fluorescence was recorded from 500 to 550 nm for GFP signals and from 610 to 700 nm (on META detector) for rhodamine signals. Confocal imaging was performed with a Zeiss LSM 510 META confocal system (10×, 0.3 NA). In multitrack mode, GFP signals were collected between 505 and 530 nm with 488 nm excitation, and rhodamine signals between 560 and 615 nm with 543 nm excitation.

1. Bonnefont X, et al. (2005) Revealing the large-scale network organization of growth hormone-secreting cells. *Proc Natl Acad Sci USA* 102:16880–16885.  
2. Jung SK, Aspinwall CA, Kennedy RT (1999) Detection of multiple patterns of oscillatory oxygen consumption in single mouse islets of Langerhans. *Biochem Biophys Res Commun* 259:331–335.

3. Orsäter H, Liss P, Lund PE, Akerman KE, Bergsten P (2000) Oscillations in oxygen tension and insulin release of individual pancreatic ob/ob mouse islets. *Diabetologia* 43:1313–1318.  
4. Zar JH (1999) *Biostatistical Analysis* (Prentice Hall, Englewood Cliffs, NJ).  
5. Baccam N, et al. (2007) Dual-level afferent control of growth hormone-releasing hormone (GHRH) neurons in GHRH-green fluorescent protein transgenic mice. *J Neurosci* 27:1631–1641.







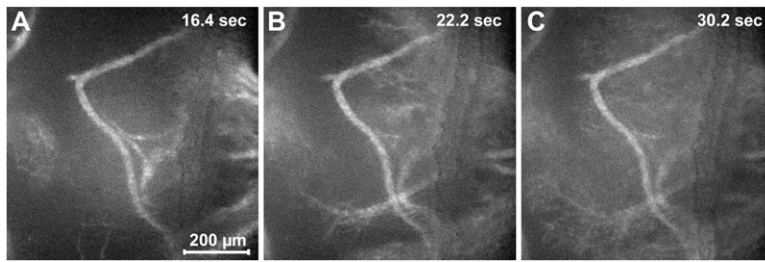

**Fig. S7.** In vivo imaging of incoming molecules through the microvasculature at low magnification. Time-lapse imaging of 4 kDa rhodamine-dextran in pituitary vessels, with the palate bone polished ([Movie S4](#)). Values indicate the time delay after dye injection. Right–left direction shows the rostrocaudal orientation of the gland.

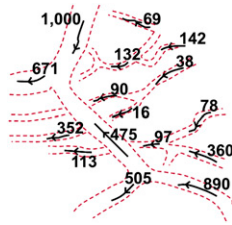

**Fig. S8.** RBC velocities in the microcirculation of the GH-eGFP mouse illustrated in Fig. 5A. Schematics of vessel locations (red dashed lines), RBC velocities in vessel branches, and blood flow directions (arrows). These were estimated after i.v. injection of 500 kDa fluorescein dextran.

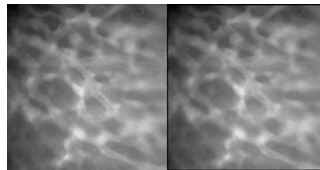

**Movie S1.** Movie of a pituitary field registered in vivo before (*Left*) and after (*Right*) movement registration, respectively ([Fig. S1](#)).

[Movie S1](#)

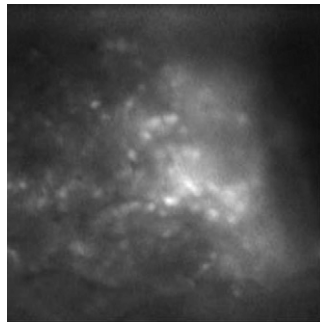

**Movie S2.** In vivo calcium spiking in pituitary cells ([Fig. S2](#)).

[Movie S2](#)

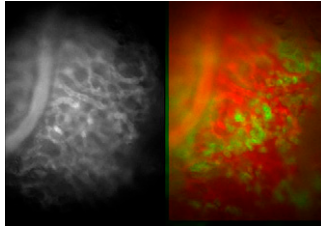

**Movie S3.** In vivo imaging of rhodamine dextran-labeled vasculature (*Left*) and corresponding RBC velocities in vessel branches (red) in a GH-eGFP (green) pituitary (Fig. 2A).

[Movie S3](#)

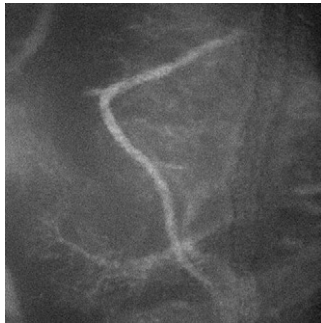

**Movie S4.** Low-magnification pituitary distribution of 4-kDa rhodamine-labeled dextran, which was injected i.v. (Fig. S7).

[Movie S4](#)

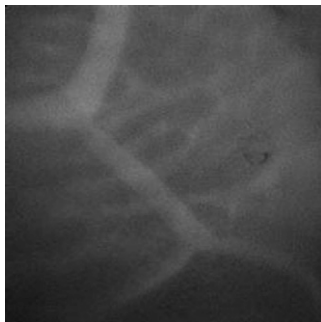

**Movie S5.** High-magnification pituitary distribution of 4-kDa rhodamine-labeled dextran, which was injected i.v. (Fig. 5A).

[Movie S5](#)

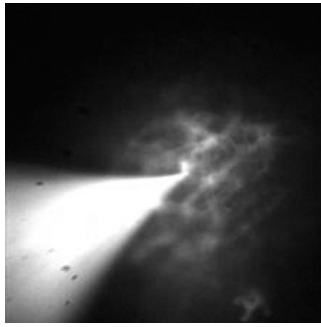

**Movie S6.** Pituitary distribution of 4-kDa rhodamine-labeled dextran, which was iontophoretically injected into the parenchyma (Fig. 5B). The movie rate was increased 3-fold. Inspection of the movie clearly shows that the initial introduction of fluorescent markers is confined and distant from some uptake sites, that the smaller-sized dextrans move evenly toward, and are rapidly cleared by, the local microvasculature.

[Movie S6](#)

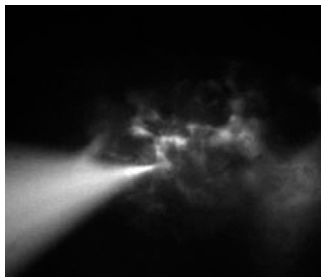

**Movie S7.** Pituitary distribution of 20-kDa FITC-labeled dextran, which was iontophoretically injected into the parenchyma (Fig. 5D).

[Movie S7](#)
